# Supplementary material
Source: HighWire-hosted journal article supplement (https://erj.ersjournals.com/content/57/5/2100022)
Supplement: inline-supplementary-material-1 [file inline-supplementary-material-1.pdf]

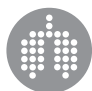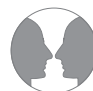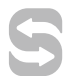

SHAREABLE PDF

# Cochrane review update leaves big questions unanswered regarding vaping: implications for medical practitioners

Kielan Darcy McAlinden<sup>1,5</sup>, Kathryn Barnsley<sup>2,5</sup>, Heinrich C. Weber<sup>1,3</sup>, Greg Haug<sup>1,4</sup>, Collin Chia<sup>1,4</sup>, Mathew Suji Eapen <sup>1</sup> and Sukhwinder Singh Sohal<sup>1</sup>

**Affiliations:** <sup>1</sup>Respiratory Translational Research Group, Dept of Laboratory Medicine, School of Health Sciences, College of Health and Medicine, University of Tasmania, Launceston, Australia. <sup>2</sup>School of Medicine, University of Tasmania, Hobart, Australia. <sup>3</sup>Dept of Paediatrics and Respiratory Medicine, Tasmanian Health Service – North West, Burnie, Australia. <sup>4</sup>Dept of Respiratory Medicine, Launceston General Hospital, Launceston, Australia. <sup>5</sup>Equal contributors.

**Correspondence:** Sukhwinder Singh Sohal, Respiratory Translational Research Group, Dept of Laboratory Medicine, School of Health Sciences, College of Health and Medicine, University of Tasmania, Locked Bag – 1322, Newnham Drive, Launceston, Tasmania 7248, Australia. E-mail: sssohal@utas.edu.au

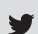

@ERSpublications

**Emerging scientific evidence for vaping-induced lung disease is stronger than short-term behavioural whims. Cease smoking, cease vaping for true nicotine cessation and for healthier lungs.** <https://bit.ly/3cUfhOv>

**Cite this article as:** McAlinden KD, Barnsley K, Weber HC, *et al.* Cochrane review update leaves big questions unanswered regarding vaping: implications for medical practitioners. *Eur Respir J* 2021; 57: 2100022 [<https://doi.org/10.1183/13993003.00022-2021>].

This single-page version can be shared freely online.

*To the Editor:*

We read with great interest the recent correspondence by PISINGER and VESTBO [1], published in the *European Respiratory Journal*, which summarises the findings of a Cochrane review on electronic cigarettes for smoking cessation [2]. We strongly agree with PISINGER and VESTBO [1] that the authors have not presented a balanced scientific view and have overlooked the dangers of early, such as e-cigarette or vaping associated lung injury (EVALI), and long-term electronic cigarette use. This is an important public health issue, and we would like to further enhance this discussion.
